# Supplementary material for: A surface ionization detector for capillary gas chromatography
Source: Royal Society of Chemistry journal article supplement (doi:10.1039/c0cc04528d), 2010-12-20
Supplement: c0cc04528d.pdf [file c0cc04528d.pdf]

## Electronic Supplemental Information

### A Surface Ionization Detector for Capillary Gas Chromatography

Weiwei Li, Yafeng Guan, Zheng Sheng and Dapeng Wu

#### Contents:

**S0. Experimental conditions for Fig.2, Table 1 & Fig.3**

**S1. Extraction of lidocaine as a free base**

**S2. Spiking serum with lidocaine**

**S3. Experimental conditions for the analysis of the serum extract**

**S4. Serum extraction procedures**

**S5. Extraction of tetracaine as a free base**

**S6. Spiking urine with tetracaine**

**S7. Experimental conditions for the analysis of the urine extract**

**S8. Urine extraction procedures and the analysis of the extract**

**Figure S1. Retention time difference between TEA and cyclohexane under various oven temperatures.**

**Figure S2. Comparison of GC-SID with GC-NPD for the extract of the urine spiked with 6 mg/L tetracaine.**

**S0. Experimental conditions for Fig.2, Table 1 & Fig.3**

PerkinElmer Autosystem XL Gas Chromatograph with a PSS injector. Capillary Column: 30 m×0.25 mm id× 0.25 μm HP-1. Carrier: nitrogen. SID temperature: 260 °C. Makeup gas: air purified by silica gel and active carbon, 120 ml/min. Mo emitter temperature: 370~380 °C. Bias voltage applied on the Mo emitter: +150 V~+350 V.

**S1. Extraction of lidocaine as a free base**

The lidocaine hydrochloride (purity >99%) obtained was used without further purification. The drug as a salt was first dissolved in purified water (about 1 g in 10mL). The solution was transferred into a separatory funnel. Then, 0.2 mL of 2 M Na<sub>2</sub>CO<sub>3</sub> was added into the solution. Instantly, the solution became cloudy with many white fine particles being suspended. To extract the free base of lidocaine, about 5 mL of ethylether was added into a separatory funnel. After shaking the funnel several times, the water layer became clear. The organic layer was transferred into a sample vial and concentrated under nitrogen.

1

## 2 **S2. Spiking serum with lidocaine**

3 Serum spiked with 440  $\mu\text{g/L}$  lidocaine was prepared as follows: (1) The stock solution of 110  
4  $\text{mg/L}$  lidocaine in ethanol was prepared; (2) Samples of 0.5 mL serum were spiked with 2  $\mu\text{L}$   
5 of the stock solution and were then shaken for 1 min.

6

## 7 **S3. Experimental conditions for the analysis of the serum extract**

8 GC-SID conditions:

9 PerkinElmer Autosystem XL Gas Chromatograph. PSS injector: 330  $^{\circ}\text{C}$ , splitless mode. Oven  
10 temperature programming : 80  $^{\circ}\text{C}$  for 2.5 min, programmed at 40  $^{\circ}\text{C}/\text{min}$  to 210  $^{\circ}\text{C}$ , and hold for  
11 15min. Capillary Column: 30  $\text{m} \times 0.25 \text{ mm id} \times 0.25 \mu\text{m}$  HP-1. Carrier:  $\text{N}_2$ , 0.8  $\text{mL}/\text{min}$  in the  
12 constant flow mode. SID temperature: 280  $^{\circ}\text{C}$ . Makeup gas of the SID: air purified by silica  
13 gel and activated carbon, 120  $\text{mL}/\text{min}$ . Mo emitter temperature: 370~380  $^{\circ}\text{C}$ .

14 GC-NPD conditions:

15 Varian CP-3800 Gas Chromatograph. 1177 injector in the splitless mode. NPD temperature:  
16 350  $^{\circ}\text{C}$ . Bead current: 3.450 A. Gases of the NPD: air purified by silica gel and activated  
17 carbon, 175  $\text{mL}/\text{min}$ ;  $\text{H}_2$ , 4.0  $\text{mL}/\text{min}$ ,  $\text{N}_2$ , 30  $\text{mL}/\text{min}$ . Other conditions were the same as the  
18 above GC-SID conditions.

19

## 20 **S4. Serum extraction procedures**

21 The serum extraction procedures similar with that described by Fujii<sup>12</sup> were as follows: (1)  
22 To 0.5 mL of serum, add 0.4 mL of 0.5 M NaOH. (2) To each add 0.5 mL of isopentanol. (3)  
23 Shake 1 min. Centrifuge at 3000  $\text{r}/\text{min}$  for 8 min. (3) Aspirate the upper organic layer into a  
24 vial. (4) Inject 0.1  $\mu\text{L}$  of extracted samples into the GC injector in a splitless mode.

25

## 26 **S5. Extraction of tetracaine as a free base**

27 The tetracaine hydrochloride (purity >99%) obtained was used without further purification.  
28 The drug as a salt was first dissolved in purified water (about 0.4 g in 20 mL). The solution  
29 was transferred into a separatory funnel. Then, 0.2 mL of 2 M  $\text{Na}_2\text{CO}_3$  was added into the  
30 solution. Instantly, the solution became cloudy with many white fine particles being  
31 suspended. To extract the free base of tetracaine, about 15 mL of ethylester was added into  
32 the funnel. During the extraction, the water layer gradually became clear. The organic layer  
33 was transferred into a round bottom flask and concentrated by a rotary evaporator at room  
34 temperature.

35

## 36 **S6. Spiking urine with tetracaine**

1 Urine spiked with 6 mg/L tetracaine was prepared as follows: (1) The stock solution of 3000  
2 mg/L tetracaine in ethanol was prepared; (2) Samples of 0.5 mL urine were spiked with 1  $\mu$ L  
3 of the stock solution and were then shaken for 1 min.

4

#### 5 **S7. Experimental conditions for the analysis of the urine extract**

6 The experimental conditions for the analysis of the urine extract were the same as S4 except  
7 for the oven temperature programming. Oven: 80  $^{\circ}$ C for 2.5 min, programmed at 40  $^{\circ}$ C/min to  
8 250  $^{\circ}$ C, and hold for 10min.

9

#### 10 **S8. Urine extraction procedures and the analysis of the extract**

11 The urine extraction procedures similar with that described by Fujii<sup>12</sup> were as follows: (1) To  
12 0.5 mL of urine, add 0.3 mL of 2 M Na<sub>2</sub>CO<sub>3</sub>. (2) To each add 0.5 mL of isopentanol (purity  
13 >98.5%). (3) Shake 1 min. Centrifuge at 3000 r/min for 8 min. (3) Aspirate the upper organic  
14 layer into a vial. (4) Inject 0.1  $\mu$ L of extracted samples into the GC injector in a splitless mode.  
15 The recovery was tested with urine samples containing 6 mg/L tetracaine. The recovery from  
16 nine analysis from seven analysis was about 95 % ~125 %. Figure S2 shows SID  
17 chromatograms (b) and the NPD chromatogram (c) of extracts of urine containing tetracaine  
18 (440  $\mu$ g/L). Comparing Figure S2 (b) with Figure S2 (a), the trace amounts of tetracaine was  
19 detected by the SID with about 300 times peak height of the noise. In Figure S2 (c), the  
20 tetracaine was detected by the NPD with about 30 times peak height of the noise. The  
21 sensitivity of the SID to tetracaine was more sensitive than that of the NPD we used.

22

#### 23 **Figure S1. Retention time difference between TEA and cyclohexane under various oven** 24 **temperatures.**

25

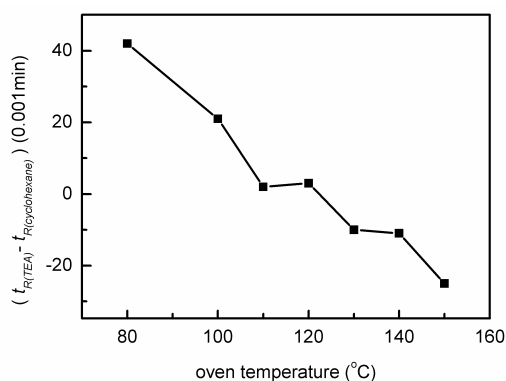

26

27 Figure S1. Retention time difference between TEA and cyclohexane under various oven  
28 temperatures.

29

30

31

1  
2  
3  
4  
5

**Figure S2. Comparison of GC-SID with GC-NPD for the analysis of extract of the urine spiked with 6 mg/L tetracaine.**

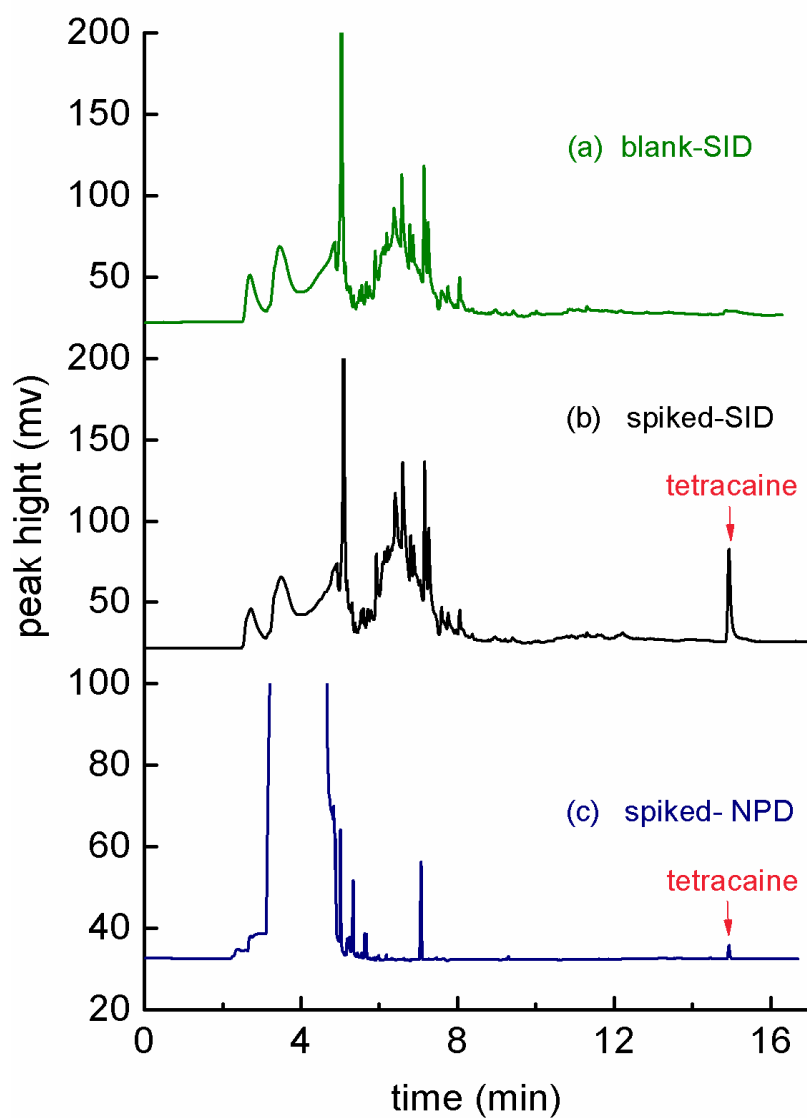

6  
7  
8  
9  
10

Figure S2. Comparison of GC-SID with GC-NPD for the extract of the urine spiked with 6 mg/L tetracaine. (a) GC-SID chromatogram of the blank urine extract; (b) GC-SID chromatogram of the spiked urine extract; (c) GC-NPD chromatogram of the spiked urine extract.
